# Supplementary material for: Environmental Impoverishment, Aging, and Reduction in Mastication Affect Mouse Innate Repertoire to Explore Novel Environments and to Assess Risk
Source: PubMed Central journal article supplement (PMC6427831; doi:10.3389/fnins.2019.00107), 2019-03-14
Supplement: Presentation_1.pdf [file Presentation_1.pdf]

**Table 1:** Representation of the mean and respective standard error values of the total distance traveled in meters, minute by minute, during the 5 minutes of open field test for the various experimental groups in the different diet regimes (HD, HD/SD and HD/SD/HD), age (6M, 12M and 18M) in an impoverished environment (IE).

| <b>DISTANCE (m): mean ± standard error</b> |                              |                              |                              |                              |                              |
|--------------------------------------------|------------------------------|------------------------------|------------------------------|------------------------------|------------------------------|
| <b>Impoverished Environment</b>            |                              |                              |                              |                              |                              |
| <b>GROUPS</b>                              | <b>1<sup>st</sup> minute</b> | <b>2<sup>nd</sup> minute</b> | <b>3<sup>th</sup> minute</b> | <b>4<sup>th</sup> minute</b> | <b>5<sup>th</sup> minute</b> |
| <i><b>HD – 6M</b></i>                      | 4.54 ± 0.33                  | 3.35 ± 0.56                  | 2.77 ± 0.24*                 | 1.97 ± 0.29*                 | 1.74 ± 0.37* <sup>+</sup>    |
| <i><b>HD/SD – 6M</b></i>                   | 3.94 ± 0.42                  | 3.01 ± 0.76                  | 2.06 ± 0.46                  | 1.33 ± 0.30*                 | 1.37 ± 0.31*                 |
| <i><b>HD/SD/HD – 6M</b></i>                | 3.09 ± 0.35                  | 1.57 ± 0.21*                 | 1.38 ± 0.23*                 | 1.31 ± 0.17*                 | 1.21 ± 0.27*                 |
| <i><b>HD – 12M</b></i>                     | 3.97 ± 0.26                  | 2.51 ± 0.38*                 | 1.48 ± 0.29*                 | 1.50 ± 0.22*                 | 1.28 ± 0.10*                 |
| <i><b>HD/SD – 12M</b></i>                  | 3.51 ± 0.43                  | 1.83 ± 0.43                  | 1.38 ± 0.43*                 | 1.16 ± 0.43*                 | 0.61 ± 0.43*                 |
| <i><b>HD/SD/HD – 12M</b></i>               | 2.63 ± 0.25                  | 1.51 ± 0.30*                 | 1.25 ± 0.21*                 | 0.96 ± 0.26*                 | 0.76 ± 0.34*                 |
| <i><b>HD – 18M</b></i>                     | 3.03 ± 0.38                  | 1.47 ± 0.28*                 | 0.78 ± 0.14*                 | 1.08 ± 0.23*                 | 0.52 ± 0.19*                 |
| <i><b>HD/SD – 18M</b></i>                  | 3.24 ± 0.11                  | 2.31 ± 0.31                  | 1.41 ± 0.23*                 | 1.36 ± 0.33*                 | 1.44 ± 0.27*                 |

|                              |                 |                   |                   |                   |                   |
|------------------------------|-----------------|-------------------|-------------------|-------------------|-------------------|
| <b><i>HD/SD/HD – 18M</i></b> | $3.54 \pm 0.36$ | $2.20 \pm 0.26^*$ | $1.87 \pm 0.35^*$ | $1.59 \pm 0.38^*$ | $1.42 \pm 0.23^*$ |
|------------------------------|-----------------|-------------------|-------------------|-------------------|-------------------|

(\*) Indicates significant intra-group difference with the first minute of the test; (+) intra-group significant difference simultaneous with the first and second test minutes.

**Table 2:** Representation of the mean and respective standard error values of the total distance traveled in meters, minute by minute, during the 5 minutes of open field test for the various experimental groups in the different diet regimes (HD, HD/SD and HD/SD/HD), age (6M, 12M and 18M) in an enriched environment (EE).

| <b>DISTANCE (m): mean ± standard error</b> |                              |                              |                              |                              |                              |
|--------------------------------------------|------------------------------|------------------------------|------------------------------|------------------------------|------------------------------|
| <b>Enriched Environment</b>                |                              |                              |                              |                              |                              |
| <b>GROUPS</b>                              | <b>1<sup>st</sup> minute</b> | <b>2<sup>nd</sup> minute</b> | <b>3<sup>th</sup> minute</b> | <b>4<sup>th</sup> minute</b> | <b>5<sup>th</sup> minute</b> |
| <i><b>HD – 6M</b></i>                      | 3.70 ± 0.30                  | 1.68 ± 0.25*                 | 1.16 ± 0.17*                 | 0.49 ± 0.25* <sup>+</sup>    | 0.56 ± 0.20* <sup>+</sup>    |
| <i><b>HD/SD – 6M</b></i>                   | 3.71 ± 0.40                  | 1.40 ± 0.43*                 | 0.81 ± 0.25*                 | 0.89 ± 0.21*                 | 0.27 ± 0.11*                 |
| <i><b>HD/SD/HD – 6M</b></i>                | 3.97 ± 0.42                  | 2.02 ± 0.55*                 | 1.01 ± 0.23*                 | 0.62 ± 0.16* <sup>+</sup>    | 0.75 ± 0.16*                 |
| <i><b>HD – 12M</b></i>                     | 4.05 ± 0.26                  | 2.61 ± 0.32*                 | 1.74 ± 0.36*                 | 1.37 ± 0.43*                 | 0.86 ± 0.25* <sup>+</sup>    |
| <i><b>HD/SD – 12M</b></i>                  | 3.28 ± 0.13                  | 2.23 ± 0.15*                 | 1.63 ± 0.18*                 | 1.07 ± 0.33* <sup>+</sup>    | 1.37 ± 0.30*                 |
| <i><b>HD/SD/HD – 12M</b></i>               | 4.49 ± 0.25                  | 2.34 ± 0.39*                 | 1.86 ± 0.28*                 | 0.64 ± 0.28* <sup>+</sup>    | 0.87 ± 0.42* <sup>+</sup>    |
| <i><b>HD – 18M</b></i>                     | 2.76 ± 0.31                  | 1.11 ± 0.10*                 | 1.00 ± 0.28*                 | 0.70 ± 0.15*                 | 0.72 ± 0.17*                 |
| <i><b>HD/SD – 18M</b></i>                  | 3.19 ± 0.31                  | 1.64 ± 0.23*                 | 1.09 ± 0.29*                 | 0.91 ± 0.32*                 | 0.73 ± 0.24*                 |

|                              |                 |                   |                   |                   |                   |
|------------------------------|-----------------|-------------------|-------------------|-------------------|-------------------|
| <b><i>HD/SD/HD – 18M</i></b> | $3.06 \pm 0.37$ | $1.68 \pm 0.30^*$ | $0.82 \pm 0.24^*$ | $0.70 \pm 0.24^*$ | $0.85 \pm 0.33^*$ |
|------------------------------|-----------------|-------------------|-------------------|-------------------|-------------------|

(\*) Indicates significant intra-group difference with the first minute of the test; (+) intra-group significant difference simultaneous with the first and second test minutes.

**Table 3:** Representation of the values obtained after the one-way ANOVA in the post-test of Tukey (q) and p-value (p) significant for the distance traveled (m), minute by minute of test, in the open field for the groups (HD, HD/SD, HD/SD/ HD), age (6M, 12M and 18M) in an impoverished (IE) and enriched environment (EE).

| GROUPS                 |           | ANOVA-one way                          | 1 <sup>st</sup> vs 2 <sup>nd</sup> (minute) | 1 <sup>st</sup> vs 3 <sup>th</sup> (minute) | 1 <sup>st</sup> vs 4 <sup>th</sup> (minute) | 1 <sup>st</sup> vs 5 <sup>th</sup> (minute) | 2 <sup>nd</sup> vs 4 <sup>th</sup> (minute) | 2 <sup>nd</sup> vs 5 <sup>th</sup> (minute) |
|------------------------|-----------|----------------------------------------|---------------------------------------------|---------------------------------------------|---------------------------------------------|---------------------------------------------|---------------------------------------------|---------------------------------------------|
| <b>HD<br/>6M</b>       | <b>IE</b> | $F_{(4,25)} = 9.1151$<br>$p = 0.0002$  | -                                           | $q_{(10)} = 4.7253$<br>$p < 0.05$           | $q_{(10)} = 6.8697$<br>$p < 0.01$           | $q_{(10)} = 2.7992$<br>$p < 0.01$           | -                                           | $q_{(10)} = 4.2848$<br>$p < 0.02$           |
|                        | <b>EE</b> | $F_{(4,25)} = 30.5695$<br>$p < 0.0001$ | $q_{(10)} = 8.4839$<br>$p < 0.01$           | $q_{(10)} = 10.715$<br>$p < 0.01$           | $q_{(10)} = 13.5215$<br>$p < 0.01$          | $q_{(10)} = 13.2194$<br>$p < 0.01$          | $q_{(10)} = 5.0375$<br>$p < 0.05$           | $q_{(10)} = 4.7355$<br>$p < 0.05$           |
| <b>HD/SD<br/>6M</b>    | <b>IE</b> | $F_{(4,25)} = 5.4621$<br>$p = 0.003$   | -                                           | -                                           | $q_{(10)} = 5.4363$<br>$p < 0.01$           | $q_{(10)} = 5.342$<br>$p < 0.01$            | -                                           | -                                           |
|                        | <b>EE</b> | $F_{(4,25)} = 19.4155$<br>$p < 0.0001$ | $q_{(10)} = 7.5731$<br>$p < 0.01$           | $q_{(10)} = 9.5196$<br>$p < 0.01$           | $q_{(10)} = 9.2597$<br>$p < 0.01$           | $q_{(10)} = 11.2729$<br>$p < 0.01$          | -                                           | -                                           |
| <b>HD/SD/HD<br/>6M</b> | <b>IE</b> | $F_{(4,25)} = 9.448$<br>$p = 0.0002$   | $q_{(10)} = 5.9893$<br>$p < 0.01$           | $q_{(10)} = 6.7303$<br>$p < 0.01$           | $q_{(10)} = 6.9904$<br>$p < 0.01$           | $q_{(10)} = 7.3971$<br>$p < 0.01$           | -                                           | -                                           |
|                        | <b>EE</b> | $F_{(4,25)} = 16.8077$<br>$p < 0.0001$ | $q_{(10)} = 5.7118$<br>$p < 0.01$           | $q_{(10)} = 8.6927$<br>$p < 0.01$           | $q_{(10)} = 9.8386$<br>$p < 0.01$           | $q_{(10)} = 9.4477$<br>$p < 0.01$           | -                                           | -                                           |
| <b>HD<br/>12 M</b>     | <b>IE</b> | $F_{(4,25)} = 17.928$<br>$p < 0.0001$  | $q_{(10)} = 5.4764$<br>$p < 0.01$           | $q_{(10)} = 9.3724$<br>$p < 0.01$           | $q_{(10)} = 9.2668$<br>$p < 0.01$           | $q_{(10)} = 10.121$<br>$p < 0.01$           | -                                           | $q_{(10)} = 4.6446$<br>$p < 0.01$           |
|                        | <b>EE</b> | $F_{(4,25)} = 14.404$<br>$p < 0.0001$  | $q_{(10)} = 4.3518$<br>$p < 0.05$           | $q_{(10)} = 7.0149$<br>$p < 0.01$           | $q_{(10)} = 8.1216$<br>$p < 0.01$           | $q_{(10)} = 9.6755$<br>$p < 0.01$           | -                                           | $q_{(10)} = 5.3237$<br>$p < 0.01$           |

|                                 |           |                                       |                                   |                                   |                                   |                                   |                                   |                                   |
|---------------------------------|-----------|---------------------------------------|-----------------------------------|-----------------------------------|-----------------------------------|-----------------------------------|-----------------------------------|-----------------------------------|
| <b><i>HD/SD<br/>12 M</i></b>    | <b>IE</b> | $F_{(4,25)} = 6.6058$<br>$p < 0.0012$ | -                                 | $q_{(10)} = 4.9511$<br>$p < 0.05$ | $q_{(10)} = 5.4645$<br>$p < 0.01$ | $q_{(10)} = 6.7575$<br>$p < 0.01$ | -                                 | -                                 |
|                                 | <b>EE</b> | $F_{(4,25)} = 13.95$<br>$p < 0.0001$  | $q_{(10)} = 4.467$<br>$p < 0.05$  | $q_{(10)} = 7.072$<br>$p < 0.01$  | $q_{(10)} = 9.4348$<br>$p < 0.01$ | $q_{(10)} = 8.1573$<br>$p < 0.01$ | $q_{(10)} = 4.9678$<br>$p < 0.01$ |                                   |
| <b><i>HD/SD/HD<br/>12 M</i></b> | <b>IE</b> | $F_{(4,25)} = 22.519$<br>$p < 0.0009$ | -                                 | $q_{(10)} = 4.931$<br>$p < 0.05$  | $q_{(10)} = 6.033$<br>$p < 0.01$  | $q_{(10)} = 6.7367$<br>$p < 0.01$ | -                                 | -                                 |
|                                 | <b>EE</b> | $F_{(4,25)} = 21.254$<br>$p < 0.0001$ | $q_{(10)} = 6.4674$<br>$p < 0.01$ | $q_{(10)} = 7.9073$<br>$p < 0.01$ | $q_{(10)} = 11.537$<br>$p < 0.01$ | $q_{(10)} = 10.868$<br>$p < 0.01$ | $q_{(10)} = 5.0695$<br>$p < 0.05$ | $q_{(10)} = 4.4002$<br>$p < 0.05$ |
| <b><i>HD<br/>18 M</i></b>       | <b>IE</b> | $F_{(4,25)} = 14.64$<br>$p < 0.0001$  | $q_{(10)} = 6.0426$<br>$p < 0.01$ | $q_{(10)} = 8.6932$<br>$p < 0.01$ | $q_{(10)} = 7.5354$<br>$p < 0.01$ | $q_{(10)} = 9.7051$<br>$p < 0.01$ | -                                 | -                                 |
|                                 | <b>EE</b> | $F_{(4,25)} = 15.894$<br>$p < 0.0001$ | $q_{(10)} = 7.6515$<br>$p < 0.01$ | $q_{(10)} = 8.1971$<br>$p < 0.01$ | $q_{(10)} = 9.5698$<br>$p < 0.01$ | $q_{(10)} = 9.4729$<br>$p < 0.01$ | -                                 | -                                 |
| <b><i>HDS<br/>18 M</i></b>      | <b>IE</b> | $F_{(4,25)} = 9.89$<br>$p < 0.0002$   | -                                 | $q_{(10)} = 7.024$<br>$p < 0.01$  | $q_{(10)} = 7.2156$<br>$p < 0.01$ | $q_{(10)} = 6.8892$<br>$p < 0.01$ | -                                 | -                                 |
|                                 | <b>EE</b> | $F_{(4,25)} = 12.621$<br>$p < 0.0001$ | $q_{(10)} = 5.5302$<br>$p < 0.01$ | $q_{(10)} = 7.4723$<br>$p < 0.01$ | $q_{(10)} = 8.1109$<br>$p < 0.01$ | $q_{(10)} = 8.7644$<br>$p < 0.01$ | -                                 | -                                 |
| <b><i>HSDHD<br/>18 M</i></b>    | <b>IE</b> | $F_{(4,25)} = 6.9$<br>$p < 0.0009$    | -                                 | $q_{(10)} = 5.1966$<br>$p < 0.01$ | $q_{(10)} = 6.0487$<br>$p < 0.01$ | $q_{(10)} = 6.5969$<br>$p < 0.01$ | -                                 | -                                 |

|  |           |                                       |                                   |                                   |                                   |                                   |   |   |
|--|-----------|---------------------------------------|-----------------------------------|-----------------------------------|-----------------------------------|-----------------------------------|---|---|
|  | <b>EE</b> | $F_{(4,25)} = 10.939$<br>$p < 0.0001$ | $q_{(10)} = 4.6062$<br>$p < 0.05$ | $q_{(10)} = 7.4353$<br>$p < 0.01$ | $q_{(10)} = 7.8482$<br>$p < 0.01$ | $q_{(10)} = 7.3601$<br>$p < 0.01$ | - | - |
|--|-----------|---------------------------------------|-----------------------------------|-----------------------------------|-----------------------------------|-----------------------------------|---|---|
